# Supplementary material for: Six countries, six individuals: resourceful patients navigating medical records in Australia, Canada, Chile, Japan, Sweden and the USA
Source: PubMed Central journal article supplement — BMJ Open. 2020 Sep 15;10(9):e037016. doi: 10.1136/bmjopen-2020-037016 (PMC7493106; doi:10.1136/bmjopen-2020-037016), 2020-09-15
Supplement: bmjopen-2020-037016.draft_revisions.pdf [file bmjopen-2020-037016.draft_revisions.pdf]

# BMJ Open

BMJ Open is committed to open peer review. As part of this commitment we make the peer review history of every article we publish publicly available.

When an article is published we post the peer reviewers' comments and the authors' responses online. We also post the versions of the paper that were used during peer review. These are the versions that the peer review comments apply to.

The versions of the paper that follow are the versions that were submitted during the peer review process. They are not the versions of record or the final published versions. They should not be cited or distributed as the published version of this manuscript.

BMJ Open is an open access journal and the full, final, typeset and author-corrected version of record of the manuscript is available on our site with no access controls, subscription charges or pay-per-view fees (<http://bmjopen.bmj.com>).

If you have any questions on BMJ Open's open peer review process please email [info.bmjopen@bmj.com](mailto:info.bmjopen@bmj.com)

# BMJ Open

## Six Countries, Six Individuals: Resourceful patients navigating medical records in Australia, Canada, Chile, Japan, Sweden and the U.S.

|                                 |                                                                                                                                                                                                                                                                                                                                                                                                                                                                                                                                                           |
|---------------------------------|-----------------------------------------------------------------------------------------------------------------------------------------------------------------------------------------------------------------------------------------------------------------------------------------------------------------------------------------------------------------------------------------------------------------------------------------------------------------------------------------------------------------------------------------------------------|
| Journal:                        | <i>BMJ Open</i>                                                                                                                                                                                                                                                                                                                                                                                                                                                                                                                                           |
| Manuscript ID                   | bmjopen-2020-037016.R1                                                                                                                                                                                                                                                                                                                                                                                                                                                                                                                                    |
| Article Type:                   | Communication                                                                                                                                                                                                                                                                                                                                                                                                                                                                                                                                             |
| Date Submitted by the Author:   | 21-Jan-2020                                                                                                                                                                                                                                                                                                                                                                                                                                                                                                                                               |
| Complete List of Authors:       | Salmi, Liz; Beth Israel Deaconess Medical Center, OpenNotes<br>Brudnicki, Selina; University Health Network<br>Isono, Maho; International University of Health and Welfare<br>Riggare, Sara; Karolinska Institutet, Health Informatics Centre<br>Rodriquez, Cecilia; Fundacion Me Muevo<br>Schaper, Louise; Health Informatics Society of Australia<br>Walker, Jan; Beth Israel Deaconess Medical Center, General Medicine;<br>Harvard Medical School<br>Delbanco, Tom; Beth Israel Deaconess Medical Center, General<br>Medicine; Harvard Medical School |
| <b>Primary Subject Heading</b>: | Patient-centred medicine                                                                                                                                                                                                                                                                                                                                                                                                                                                                                                                                  |
| Secondary Subject Heading:      | Health services research, Qualitative research                                                                                                                                                                                                                                                                                                                                                                                                                                                                                                            |
| Keywords:                       | Health informatics < BIOTECHNOLOGY & BIOINFORMATICS, GENERAL MEDICINE (see Internal Medicine), Quality in health care < HEALTH SERVICES ADMINISTRATION & MANAGEMENT, ETHICS (see Medical Ethics)                                                                                                                                                                                                                                                                                                                                                          |
|                                 |                                                                                                                                                                                                                                                                                                                                                                                                                                                                                                                                                           |

SCHOLARONE™  
Manuscripts

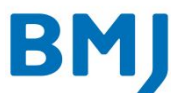

I, the Submitting Author has the right to grant and does grant on behalf of all authors of the Work (as defined in the below author licence), an exclusive licence and/or a non-exclusive licence for contributions from authors who are: i) UK Crown employees; ii) where BMJ has agreed a CC-BY licence shall apply, and/or iii) in accordance with the terms applicable for US Federal Government officers or employees acting as part of their official duties; on a worldwide, perpetual, irrevocable, royalty-free basis to BMJ Publishing Group Ltd ("BMJ") its licensees and where the relevant Journal is co-owned by BMJ to the co-owners of the Journal, to publish the Work in BMJ Open and any other BMJ products and to exploit all rights, as set out in our [licence](#).

The Submitting Author accepts and understands that any supply made under these terms is made by BMJ to the Submitting Author unless you are acting as an employee on behalf of your employer or a postgraduate student of an affiliated institution which is paying any applicable article publishing charge ("APC") for Open Access articles. Where the Submitting Author wishes to make the Work available on an Open Access basis (and intends to pay the relevant APC), the terms of reuse of such Open Access shall be governed by a Creative Commons licence – details of these licences and which [Creative Commons](#) licence will apply to this Work are set out in our licence referred to above.

Other than as permitted in any relevant BMJ Author's Self Archiving Policies, I confirm this Work has not been accepted for publication elsewhere, is not being considered for publication elsewhere and does not duplicate material already published. I confirm all authors consent to publication of this Work and authorise the granting of this licence.

## COMMUNICATION

# Six Countries, Six Individuals: Resourceful patients navigating medical records in Australia, Canada, Chile, Japan, Sweden and the U.S.

Liz Salmi,<sup>1</sup> Selina Brudnicki, MBA, PMP,<sup>2</sup> Maho Isono, PhD,<sup>3</sup> Sara Riggare,<sup>4</sup> Cecilia Rodriguez,<sup>5</sup> Louise K. Schaper, PhD,<sup>6</sup> Jan Walker, RN, MBA,<sup>7,8\*</sup> Tom Delbanco, MD<sup>7,8\*</sup>

<sup>1</sup>OpenNotes, Boston, MA, USA

<sup>2</sup>University Health Network, Toronto, Ontario, Canada

<sup>3</sup>International University of Health and Welfare, Otawara, Tochigi, Japan

<sup>4</sup>Health Informatics Centre, Karolinska Institutet, Stockholm, Sweden

<sup>5</sup>Fundación Me Muevo, Providencia, Santiago, Chile

<sup>6</sup>Health Informatics Society of Australia, South Melbourne, Victoria, Australia

<sup>7</sup>Beth Israel Deaconess Medical Center, Division of General Medicine, Boston, MA, USA

<sup>8</sup>Harvard Medical School, Boston, MA, USA

\*co-senior authors

### CORRESPONDING AUTHOR:

Liz Salmi

OpenNotes

Beth Israel Deaconess Medical Center

133 Brookline Ave

HVMA Annex, Suite 2200

Boston, MA 02215

Phone: 617.975.7611

Email: [lsalmi@bidmc.harvard.edu](mailto:lsalmi@bidmc.harvard.edu)

## ABSTRACT

In the absence of international standards, widely differing attitudes, laws, medical and social cultures strongly influence whether and how patients may access their medical records.

Reviewing records, including the notes clinicians write, can help shape how people participate in their own care. Aided at times by new technologies, individual patients and care partners are repurposing existing tools and designing innovative, often “low-tech” ways to collect, sort, and interpret their own health information. To illustrate diverse approaches that individuals may take, six individuals from six nations offer anecdotes demonstrating how they are learning to collect, assess, and benefit from their personal health information.

## KEYWORDS

medical records; electronic health records; health information technology; patient engagement

## INTRODUCTION

In the spring, 2017, healthcare teams from 11 countries convened at a Salzburg Global Seminar in Austria to examine how patients might engage more actively in their care with the help of transparent electronic medical records that are evolving globally<sup>1</sup>. More than 60 participants gathered, representing diverse points of view—clinicians, researchers, policy makers, social scientists... and patients.

The participants discussed the untapped potential of electronic medical records, and how secure systems might help patients and clinicians share personal health information. In the absence of international standards (see Table 1), widely differing attitudes, laws and interpretations of laws,<sup>2,3</sup> and medical and social cultures largely mold the degree to which individual patients participate in their care. However, patient advocates are learning to push the professions to open doors that until recently have been firmly shut. In this article, we provide a snapshot of a growing global culture of patients living (and thriving) in an evolving digital climate in six highly diverse countries— Australia, Canada, Chile, Japan, Sweden, and the United States.

**Table 1: Electronic health record systems in Australia, Canada, Chile, Japan, Sweden, and the U.S.**

| Country       | Description                                                                                                                                                                                                                                                                                                                                                                                                                                                                                                                                                                                                                                                                                                  |
|---------------|--------------------------------------------------------------------------------------------------------------------------------------------------------------------------------------------------------------------------------------------------------------------------------------------------------------------------------------------------------------------------------------------------------------------------------------------------------------------------------------------------------------------------------------------------------------------------------------------------------------------------------------------------------------------------------------------------------------|
| Australia     | In early 2019, the Australian government assigned citizens a secure, online health record. My Health Record (MyHR) aspires to house summary information uploaded from encounters with the health system nationwide. <sup>3</sup>                                                                                                                                                                                                                                                                                                                                                                                                                                                                             |
| Canada        | In Canada, 85% of family practice physicians, and 79% of specialist physicians report using an electronic medical record. <sup>4</sup> However, only 22% of Canadians can access portions of their medical records electronically. No patients have access to their entire records. <sup>5</sup>                                                                                                                                                                                                                                                                                                                                                                                                             |
| Chile         | Chile has a two-tier health system, with public and private health insurance. <sup>6</sup> Roughly 73% of community hospitals, 68% of primary care networks, and 50% of emergency care units use electronic health records. <sup>7</sup> However, use of health IT by patients is limited to making online appointments or accessing public health resources. If at all, citizens can access only very limited personal health information.                                                                                                                                                                                                                                                                  |
| Japan         | In Japan, a combination of health systems and hospitals operate various electronic health record systems. Citizens have the legal right to request medical records, but most are unaware of this opportunity. The majority of citizens do not have digital access to their health records, although apps are available that display lists of prescriptions available at pharmacies. <sup>8</sup>                                                                                                                                                                                                                                                                                                             |
| Sweden        | Swedish citizens have the right to receive copies of their medical records. The Swedish government established a national health information infrastructure connecting a national patient portal with all different electronic health record systems used in the country. The patient portal gives one access to their electronic health record, and is accessible using an ID based on a national personal identification number. Individual counties decide what information patients can access from their electronic health record systems. As of July 2019, 61% of citizens had logged into the patient portal account and 29% had accessed their record through the portal at least once. <sup>9</sup> |
| United States | About 80% of doctors, and nearly all hospitals in the US use electronic health records (EHRs). <sup>10</sup> In 2017, a little over half of patients reported offers of online access to their records, either by their providers or by their insurers. Among them, a little more than half registered on secure portals offered by EHR vendors and viewed their records at least once. <sup>11</sup> Health systems control what patients can and cannot access through these portals.                                                                                                                                                                                                                      |

1  
2  
3 Today, as increasing numbers of nations spend billions on health information technology, what  
4 patients might want in this new and rapidly evolving context is often lost or remains unheard,  
5 with many stuck in a paper-era or with a health portal to nowhere.<sup>12,13</sup> Rhetoric about “patient-  
6 centered care” abounds, but only rarely does it extend appropriately to medical records. More  
7 than 20 years ago, in an earlier Salzburg Seminar, a nurse from Norway suggested a patient-  
8 centric mantra: “*Nothing about me without me.*”<sup>14</sup> While antedated by a Polish aphorism  
9 centuries ago, this guidepost maintains its currency and, as our stories imply, symbolizes our  
10 sense of urgency.  
11  
12  
13  
14

## 15 Perspectives

---

### 18 Sweden: Knowledge is power

19 Sara Riggare

20  
21 In the mid-1980s, I discovered in my early teens that something was not right with my body. At  
22 times, my muscles became rigid and tense, making me slow and clumsy, especially during  
23 repetitive movements such as brushing my teeth. I learned I have a form of Parkinson’s  
24 disease, and for more than 30 years now I have been living with this condition.  
25  
26

27  
28 My overall strategy? Care for myself. Without medications, my body does not function, but my  
29 doctor has *no way of knowing* if and how I take medications he prescribes. Until recently, my  
30 neurologist did not provide online access to my healthcare records, but I collected them all on  
31 paper and placed them in a binder. I review open access scientific publications online, looking  
32 for new research results that might benefit me. I combine what I learn with data and  
33 observations I collect myself, all of which enables me to understand and better manage my  
34 condition.  
35  
36

37  
38 Some years back I came across a new study documenting effects of a drug under evaluation for  
39 *freezing of gait*, one of my symptoms. I emailed the article to my neurologist. We agreed it was  
40 worth exploring, and I got a prescription. Soon we both concluded it indeed did improve my gait.  
41

42  
43 Working with a doctor this way is not unique to me. In a recent survey, 68% of Swedish  
44 respondents with Parkinson’s disease saw their neurologist for an hour or less annually.<sup>15</sup>  
45 As patients, we take prime responsibility for managing our own health. Meanwhile, our  
46 neurologists can attend to people who need more help.  
47

### 48 Chile: My arthritis, in bits and pieces

49 Cecilia Rodriguez

50  
51  
52 I have rheumatoid arthritis, and when I go to the hospital for a day to get my IV medication, they  
53 print a copy of the visit and give it to me. Often it is handwritten and hard to read. Beyond that, I  
54 can get some exam results from the clinic website, but only with a special code for a one-time  
55 download. I cannot compare results of my exams in one place, so I print them or save them on  
56  
57  
58  
59  
60

1  
2  
3 my computer in case I need to look at them again. I want to make my own decisions, so this has  
4 meant getting lots of paper together. But often I can't find the right one. I know I put it  
5 somewhere!  
6  
7

8 This year, my mom gave me a notebook for my birthday. It had the medical information she had  
9 saved from the first 14 years of my life! It might sound crazy or unnecessary, but it's important  
10 for me. I was once admitted for a pericardium problem (pericarditis). Afterwards, I couldn't  
11 remember my actual diagnosis; I kept forgetting things I wanted to tell my doctor; and he kept  
12 telling me things that were so important. I laugh about this present from my mom, but it makes  
13 me feel safe to have my medical story together again.  
14  
15

### 16 **Japan: Can technology help patients become more active agents in their care?**

17 **Maho Isono, PhD**  
18  
19

20 I think medicine in Japan is profiting from listening carefully to patients. As anthropologist Arthur  
21 Kleinman pointed out, the community is the biggest space in which patients deal with illness.<sup>16</sup>  
22 Today this space is changing and growing rapidly because of the expansion of online platforms  
23 where patients can take in and mingle knowledge from scientific medicine and traditional  
24 medicine. Then they establish their own understanding and management for their illness.  
25 Patients move beyond being objects of biomedicine to become active agents who choose how  
26 and when to move around within the various sectors of health and illness.  
27  
28  
29

30 Numerous communities of patient activists exist in Japan. One patient movement is *tojisha-*  
31 *kenkyu*. *Kenkyu* means research, study, or investigation. Founded initially by a social worker in  
32 1984, these have become centers for advocacy for people with mental disorders. One of their  
33 well-known activities is *tojisha-kenkyu*, where patients get together and study themselves.  
34 Different from self-support groups, such communities both conduct research and share their  
35 findings with the public, and technology takes on a crucial role in this process. This has been  
36 particularly significant for people with mental disorders, since in our country their experiences  
37 have often been suppressed and hidden.<sup>17</sup>  
38  
39  
40

41 Some patients are trying and reporting that new technologies are helping. However, patients  
42 occasionally report that technology is increasing anxiety, rather than helping. I have an  
43 acquaintance whose atrial fibrillation comes and goes. He bought a micro ECG machine to keep  
44 track of his pulse. He tried to find a pattern in his irregular pulse, but over time couldn't make  
45 one out. He didn't enjoy watching his irregular pulses every day, and eventually he stopped  
46 wearing the device. Our engaged patients are still discovering how to strike the right balance in  
47 patient empowerment.  
48  
49  
50

### 51 **Canada: From access, to control of our own health data**

52 **Selina Brudnicki**  
53  
54

55 I saw first-hand the hardships my late mother experienced obtaining copies of her records. She  
56 had to navigate her health and share information with her care team. She underwent breast  
57  
58  
59  
60



1  
2  
3 cancer treatment at several facilities and learned to interpret her results with the help of her  
4 doctors. I kept her 'big binder' of results. It includes pathology and diagnostic imaging reports,  
5 and even a few oncologists' notes. Therein lies also my mother's own handwritten note: "[The  
6 doctor's] report does not seem correct. I always mention 'pain,' not discomfort. I kept  
7 complaining about a new pain." One year too late, a second opinion and review of her medical  
8 notes revealed that she and her doctor were not on the same page. There was evidence that  
9 her cancer had already spread to her lungs and liver. She died soon thereafter.  
10  
11

12  
13 I am a senior manager at University Health Network (UHN), Toronto, and my colleagues and I  
14 work closely with patients to understand their needs and priorities so they can better manage  
15 their health. Co-designed with patients, care partners and staff, we co-created a secure website  
16 that enables patients to see their appointment schedules, test results, pathology and diagnostic  
17 imaging reports, and clinical notes at the same time they become available to their care team.  
18 There are links to patient education resources, and patients may share their health record with  
19 others. After a year, 94% of patients reported improved patient experience. They felt better  
20 prepared for appointments, for decisions they needed to make, and reported improved  
21 communication and management of their care.<sup>18</sup>  
22  
23

24  
25 Today, patients want visibility and transparency into all their health data, but they face a large  
26 cultural divide: Health information custodians and care providers in our country currently control  
27 what, when, and 'if' patients can access their own data. In response, we are collaborating with  
28 patients, their care partners, government and industry subject matter experts to advance a new  
29 paradigm and proof of concept. We are working to provide patients with the ability to authorize,  
30 revoke and monitor secondary use of their data. That way they can both take control over their  
31 health data and consent to sharing their data with trusted sources.  
32  
33

### 34 **Australia: Dad's old and ill. What may his future hold?**

35 **Louise K. Schaper, PhD**  
36  
37

38 Today, Dad sent me a picture of prescription medications that would fill two shoe boxes. He's  
39 been 'shopping up' big, in preparation for a 2-month vacation. I suspect it will be his last. Ever  
40 the stoic head of household, Dad tells us he's fine, and while we know that's untrue, we don't  
41 know if he's a bad liar or in denial. Every time he's prescribed a new drug or there's a new  
42 symptom, Mum phones to fill me in. My parents don't have the Internet, and since I'm the one  
43 with a health degree I get asked to interpret medical symptoms and pill prescriptions.  
44

45 Given Dad's deteriorating health, I was desperate to see what his doctors actually think, and  
46 Dad granted me proxy access to his My Health Record (MyHR). Now I can help interpret  
47 information and often put his and my family's mind at ease. But he doesn't tell his medical team  
48 about how regularly his blood pressure goes to levels that could kill most people. He 'wouldn't  
49 want to bother them.'  
50

51 I learned from Dad's record that he is on 12 different prescription medications, and there's also  
52 an audit trail of every medical appointment he has had. But it's limited to the date and name of  
53 the clinician only. Basically, the information in MyHR is limited to what's in a government  
54 database of prescriptions and appointments, information we already have. Dad's clinicians are  
55 not uploading any of his clinical notes, and neither are the pathologists. He could actually  
56  
57



1  
2  
3 request more information, but I can hear Dad's voice in my head: "No. *The doctor is too busy*  
4 *and I don't want to make a fuss.*"  
5

6 So meanwhile, my family and I are none the wiser. Our hopes remain unrealized: To uncover  
7 information that could help Dad change his behaviors or reveal errors (if he'd dare point them  
8 out to his doctors). For now, I'm left with a question that gnaws at me: "If they're denied access  
9 to their own health information, how can patients have agency over their own health?"  
10

## 11 **United States: Even the activist struggles**

12 **Liz Salmi**  
13

14  
15 I was diagnosed with an astrocytoma one week after my 29<sup>th</sup> birthday, and since then I've lived  
16 in a world of uncertainty: 20 more years, or 20 more months?  
17

18  
19 My way of coping with uncertainty? Understand as much as I can about my condition and plan  
20 for treatment. For this I have found the patient portal a trusted sidekick. After surgeries,  
21 seizures, appointments and tests, the patient portal is where I turn to be reminded of the  
22 growing narrative that is my medical history.  
23

24  
25 One day, after a few months of chemotherapy, I recognized a pattern in the lab results available  
26 on my patient portal. It showed me when I was at risk for thrombocytopenia and would need to  
27 delay treatment. Thereafter, instead of waiting for permission to start my next round of oral  
28 chemotherapy, I would email my doctor:  
29

30  
31 *Dear Dr. S,*

32 *My lab work appears to be the same as last month. Please authorize a refill for*  
33 *temozolomide. Per the plan we discussed during our last visit, I will pick up the*  
34 *prescription on my way home from work tomorrow and begin my next round of chemo on*  
35 *Monday.*  
36  
37

38 She agreed with this process, and my ability to turn information into knowledge (with guidance  
39 from my doctor) returned a sense of autonomy to me at a time when I felt I had almost no  
40 control over any other aspect of my health.  
41  
42

43 Positive reinforcement from my doctors has molded me into the proactive patient I am today.  
44 However, even with widespread availability of patient portals, patient activists like me continue  
45 to struggle to gain access to the most important part of our medical records: the doctor's note. In  
46 the US, we've had the right by law for more than 20 years to request and receive copies of our  
47 full medical records—including our doctors' notes. But these requests take time and effort, and  
48 costs can be involved.<sup>19</sup> I once requested a copy of my record and finally got it on a DVD. Had I  
49 asked for a paper copy, I would have had to pay \$725.40 out of my own pocket. All that just to  
50 own what is inherently mine! Today, almost 15% of Americans have gained access to clinical  
51 notes through a portal, but the actual "read rates" of notes remain low, virtually across the  
52 board.<sup>20,21</sup> It's not easy to change long-standing culture and habits!  
53  
54  
55  
56  
57  
58  
59  
60

## In Conclusion

As these anecdotes demonstrate vividly, the global impact of electronic medical records varies widely and will no doubt continue to do so for a very long time. The emerging technologies that will further define and refine medical records need to reflect different cultures, individual sensibilities, socio-economic factors, and myriad other phenomena. But the perspectives we display have a common denominator: persistent resourcefulness as individuals work to bridge gaps in their personal health information.

Some describe patient engagement as the “blockbuster drug” of the 21<sup>st</sup> century, but how many will want to engage in ways described by those featured in this paper?<sup>22</sup> Are large numbers of people, perhaps even most people, capable of becoming so resourceful? We suggest the answer may be “yes.” We suspect the potential is there, with the caveat that patients become truly engaged only when they have a more complete picture of their own health.

Transparent medical information is spreading. While in some cultures different views prevail, most nations agree today that patients have a right to access their own health information. Offering patients ready access to their own medical records makes sense, because patients (and their care partners) need abundant information in order to engage optimally in their care, while regaining and retaining autonomy in their lives.

## ACKNOWLEDGEMENTS

---

The authors wish to thank the alumni of Salzburg Global Session 553 (“Toward a Shared Culture of Health: Enriching and Charting the Patient-Clinician Relationship”) for their leadership on this topic.

## AUTHORS’ CONTRIBUTIONS

---

All authors contributed substantially to the manuscript. TD, LS, and JW conceived the idea and design. LS, SB, MI, SR, CR, and LKS developed country-specific content. TD, LS, and JW drafted and critically revised the text.

## CONFLICTS OF INTEREST

---

The authors report no conflict of interest.

## FUNDING STATEMENT

---

This work was supported by the Salzburg Seminar, the John F. Keane and Family Foundation, and the WANG Foundation.

## REFERENCES

---

1. Delbanco T, Esch T. Toward a Shared Culture of Health: Enriching and Charting the Patient-Clinician Relationship Session 553. In: *Salzburg Global Seminar*. ; 2017. <https://www.salzburgglobal.org/multi-year-series/health/pageId/session-553.html>. Accessed October 24, 2019.
2. Krumholz HM. Opinion: It Should Be Easier To Access Your Medical Records : Shots. *NPR*. 2019. <https://www.npr.org/sections/health-shots/2019/08/28/754725843/opinion-its-your-right-to-see-your-medical-records-it-shouldn-t-be-this-hard-to->. Accessed October 24, 2019.
3. Australian Government, Australian Digital Health Agency. My Health Record: Control your health information securely, in one place. <https://www.myhealthrecord.gov.au/>. Accessed October 24, 2019.
4. Leaver C. *Use of Electronic Medical Records among Canadian Physicians*.; 2017.
5. Canada Health Infoway. *Connecting Patients for Better Health*.; 2018.
6. Martinez-Gutierrez MS. Income and health insurance type in Chile : Effects on health and health. *Cent Lat Am Stud Univ California, Berkeley*. 2014:2010-2013.
7. Taylor EA, Fischer SH, Gracner T, et al. Current Efforts to Implement Health IT in Chile. In: *Developing a Strategic Program for Chilean Health Information Technology: Environmental Scan and Key Informant Interviews*. ; 2016:10-19. doi:10.7249/j.ctt19w739p.10
8. NPO Japan Medical Network Association. What is the Millennial Medical Record? <http://www.gehr.jp/about/index.html>. Accessed October 24, 2019.
9. Inera. Inera Statistics. <https://www.inera.se/aktuell/statistik/>.
10. Secretary of Health and Human Services. *Report to Congress on Health IT Progress: Examining the HITECH Era and the Future of Health IT*. Vol 3001.; 2016. <http://dashboard.healthit.gov/report-to-congress/2016-report-congress-examining-hitech-era-future-health-information-technology.php>.
11. Patel V, Johnson C, The Office of the National Coordinator for Health Information Technology. *Individuals' Use of Online Medical Records and Technology for Health Needs*.; 2018. <https://www.healthit.gov/sites/default/files/page/2018-03/HINTS-2017-Consumer-Data-Brief-3.21.18.pdf>. Accessed July 29, 2019.
12. Krumholz H. The Unfortunate Truth About Getting Your Medical Records. *Forbes*. 2018:5-8. [https://www.forbes.com/sites/harlankrumholz/2018/10/05/the-unfortunate-truth-about-getting-your-medical-records/amp/?\\_\\_twitter\\_impression=true](https://www.forbes.com/sites/harlankrumholz/2018/10/05/the-unfortunate-truth-about-getting-your-medical-records/amp/?__twitter_impression=true).
13. Topol E, Salmi L. Portal to nowhere. Twitter. doi:10.1017/CBO9781107415324.004
14. Delbanco T, Berwick DM, Boufford JI, et al. Healthcare in a land called peoplepower: Nothing about me without me. *Heal Expect*. 2001;4(3):144-150. doi:10.1046/j.1369-6513.2001.00145.x
15. Riggare S, Institutet K, Pär S, et al. Patients are doing it for themselves: A survey on disease-specific knowledge acquisition among people with Parkinson's disease in Sweden. *Health Informatics J*. 2019;25(1):91-105. doi:10.1177/1460458217704248
16. Kleinman A. *Patients and Healers in the Context of Culture: An Exploratio of the Boderland between Anthropology, Medicine, and Psychiatry*. Berkeley, CA: University of California, Berkeley; 1980.
17. Ishihara K. Tojisha kenkyu no Kenkyu. 2013.
18. Brudnicki S, Bishop L, Bakas V, et al. Delivering Results as Patients Access Their Online Medical Records. In: *In EHealth*. Vancouver, CA; 2018.

- 1
  - 2
  - 3
  - 4
  - 5
  - 6
  - 7
  - 8
  - 9
  - 10
  - 11
  - 12
  - 13
  - 14
  - 15
  - 16
  - 17
  - 18
  - 19
  - 20
  - 21
  - 22
  - 23
  - 24
  - 25
  - 26
  - 27
  - 28
  - 29
  - 30
  - 31
  - 32
  - 33
  - 34
  - 35
  - 36
  - 37
  - 38
  - 39
  - 40
  - 41
  - 42
  - 43
  - 44
  - 45
  - 46
  - 47
  - 48
  - 49
  - 50
  - 51
  - 52
  - 53
  - 54
  - 55
  - 56
  - 57
  - 58
  - 59
  - 60
19. Lye CT, Forman HP, Gao R, et al. Assessment of US Hospital Compliance With Regulations for Patients' Requests for Medical Records. *JAMA Netw open*. 2018;1(6):e183014. doi:10.1001/jamanetworkopen.2018.3014
20. OpenNotes®. OpenNotes Map.
21. Santa J, Wachenheim D, Chin H, Fellows A. *Implementing OpenNotes: Improving Patient Access to Notes on Patient Portals*.; 2018. [http://www.opennotes.org/wp-content/uploads/2018/12/Implementing\\_OpenNotes\\_Improving\\_Patient\\_Access\\_to\\_Notes\\_on\\_Patient\\_Portals.pdf](http://www.opennotes.org/wp-content/uploads/2018/12/Implementing_OpenNotes_Improving_Patient_Access_to_Notes_on_Patient_Portals.pdf). Accessed December 19, 2018.
22. Chase D. Patient Engagement is the Blockbuster Drug of the Century. *Forbes*. 2014:2012-2015.

For peer review only

# BMJ Open

## Six Countries, Six Individuals: Resourceful patients navigating medical records in Australia, Canada, Chile, Japan, Sweden and the U.S.

|                                 |                                                                                                                                                                                                                                                                                                                                                                                                                                                                                                                                                           |
|---------------------------------|-----------------------------------------------------------------------------------------------------------------------------------------------------------------------------------------------------------------------------------------------------------------------------------------------------------------------------------------------------------------------------------------------------------------------------------------------------------------------------------------------------------------------------------------------------------|
| Journal:                        | <i>BMJ Open</i>                                                                                                                                                                                                                                                                                                                                                                                                                                                                                                                                           |
| Manuscript ID                   | bmjopen-2020-037016.R2                                                                                                                                                                                                                                                                                                                                                                                                                                                                                                                                    |
| Article Type:                   | Communication                                                                                                                                                                                                                                                                                                                                                                                                                                                                                                                                             |
| Date Submitted by the Author:   | 29-Jun-2020                                                                                                                                                                                                                                                                                                                                                                                                                                                                                                                                               |
| Complete List of Authors:       | Salmi, Liz; Beth Israel Deaconess Medical Center, OpenNotes<br>Brudnicki, Selina; University Health Network<br>Isono, Maho; International University of Health and Welfare<br>Riggare, Sara; Karolinska Institutet, Health Informatics Centre<br>Rodriquez, Cecilia; Fundacion Me Muevo<br>Schaper, Louise; Health Informatics Society of Australia<br>Walker, Jan; Beth Israel Deaconess Medical Center, General Medicine;<br>Harvard Medical School<br>Delbanco, Tom; Beth Israel Deaconess Medical Center, General<br>Medicine; Harvard Medical School |
| <b>Primary Subject Heading</b>: | Patient-centred medicine                                                                                                                                                                                                                                                                                                                                                                                                                                                                                                                                  |
| Secondary Subject Heading:      | Health services research, Qualitative research                                                                                                                                                                                                                                                                                                                                                                                                                                                                                                            |
| Keywords:                       | Health informatics < BIOTECHNOLOGY & BIOINFORMATICS, GENERAL MEDICINE (see Internal Medicine), Quality in health care < HEALTH SERVICES ADMINISTRATION & MANAGEMENT, ETHICS (see Medical Ethics)                                                                                                                                                                                                                                                                                                                                                          |
|                                 |                                                                                                                                                                                                                                                                                                                                                                                                                                                                                                                                                           |

SCHOLARONE™  
Manuscripts

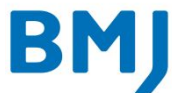

I, the Submitting Author has the right to grant and does grant on behalf of all authors of the Work (as defined in the below author licence), an exclusive licence and/or a non-exclusive licence for contributions from authors who are: i) UK Crown employees; ii) where BMJ has agreed a CC-BY licence shall apply, and/or iii) in accordance with the terms applicable for US Federal Government officers or employees acting as part of their official duties; on a worldwide, perpetual, irrevocable, royalty-free basis to BMJ Publishing Group Ltd ("BMJ") its licensees and where the relevant Journal is co-owned by BMJ to the co-owners of the Journal, to publish the Work in BMJ Open and any other BMJ products and to exploit all rights, as set out in our [licence](#).

The Submitting Author accepts and understands that any supply made under these terms is made by BMJ to the Submitting Author unless you are acting as an employee on behalf of your employer or a postgraduate student of an affiliated institution which is paying any applicable article publishing charge ("APC") for Open Access articles. Where the Submitting Author wishes to make the Work available on an Open Access basis (and intends to pay the relevant APC), the terms of reuse of such Open Access shall be governed by a Creative Commons licence – details of these licences and which [Creative Commons](#) licence will apply to this Work are set out in our licence referred to above.

Other than as permitted in any relevant BMJ Author's Self Archiving Policies, I confirm this Work has not been accepted for publication elsewhere, is not being considered for publication elsewhere and does not duplicate material already published. I confirm all authors consent to publication of this Work and authorise the granting of this licence.

## COMMUNICATION

# Six Countries, Six Individuals: Resourceful patients navigating medical records in Australia, Canada, Chile, Japan, Sweden and the U.S.

Liz Salmi,<sup>1</sup> Selina Brudnicki, MBA, PMP,<sup>2</sup> Maho Isono, PhD,<sup>3</sup> Sara Riggare,<sup>4</sup> Cecilia Rodriguez,<sup>5</sup> Louise K. Schaper, PhD,<sup>6</sup> Jan Walker, RN, MBA,<sup>1,7\*</sup> Tom Delbanco, MD<sup>1,7\*</sup>

<sup>1</sup>Division of General Medicine, Beth Israel Deaconess Medical Center, Boston, MA, USA

<sup>2</sup>University Health Network, Toronto, Ontario, Canada

<sup>3</sup>Keio University, Tokyo, Japan

<sup>4</sup>Health Informatics Centre, Karolinska Institutet, Stockholm, Sweden

<sup>5</sup>Fundación Me Muevo, Providencia, Santiago, Chile

<sup>6</sup>Health Informatics Society of Australia, South Melbourne, Victoria, Australia

<sup>7</sup>Harvard Medical School, Boston, MA, USA

\*co-senior authors

### CORRESPONDING AUTHOR:

Liz Salmi  
OpenNotes  
Beth Israel Deaconess Medical Center  
133 Brookline Ave  
HVMA Annex, Suite 2200  
Boston, MA 02215  
Phone: 617.975.7611  
Email: [lsalmi@bidmc.harvard.edu](mailto:lsalmi@bidmc.harvard.edu)

## ABSTRACT

In the absence of international standards, widely differing attitudes, and laws, medical and social cultures strongly influence whether and how patients may access their medical records in various settings of care. Reviewing records, including the notes clinicians write, can help shape how people participate in their own care. Aided at times by new technologies, individual patients and care partners are repurposing existing tools and designing innovative, often “low-tech” ways to collect, sort, and interpret their own health information. To illustrate diverse approaches that individuals may take, six individuals from six nations offer anecdotes demonstrating how they are learning to collect, assess, and benefit from their personal health information.

## KEYWORDS

medical records; electronic health records; health information technology; patient engagement



## INTRODUCTION

As increasing numbers of nations spend billions on health information technology, what patients might want in this new and rapidly evolving context is often lost or unheard. Many individuals feel stuck, whether in a paper-based system or a health portal to nowhere.<sup>1,2</sup> Rhetoric about “patient-centered care” abounds, but only rarely does it extend to accessible medical records in primary, specialty, and even hospital care.

In the spring, 2017, healthcare teams from 11 countries convened at a Salzburg Global Seminar in Austria to examine how patients might engage more actively in their care with the help of transparent electronic medical records that are evolving globally.<sup>3</sup> More than 60 participants gathered, representing diverse points of view—clinicians, researchers, policy makers, social scientists... and patients. The participants discussed the untapped potential of electronic medical records and how secure systems might help patients and clinicians share personal health information. In the absence of international standards, the degree to which individual patients participate in their care is largely molded by widely differing attitudes, laws and interpretations of laws,<sup>4,5</sup> and medical and social cultures. However, patients are increasingly convening across cultures, and patient advocates are learning to push the professions to open doors that until recently have been firmly shut.

In this article, six Seminar participants with different health care needs provide a personal snapshot of what it’s like to be a patient and read records in their respective countries. Each reported on salient characteristics of the country’s health records systems (Table 1) and considered 5 questions (Sidebar) as they wrote about their experience living—and thriving—in evolving digital climates.

**Table 1: Electronic health record systems in Australia, Canada, Chile, Japan, Sweden, and the U.S.**

| Country   | Description                                                                                                                                                                                                                                                                                                                                                                                                                                                                                                                                                                                                                                                                                                              |
|-----------|--------------------------------------------------------------------------------------------------------------------------------------------------------------------------------------------------------------------------------------------------------------------------------------------------------------------------------------------------------------------------------------------------------------------------------------------------------------------------------------------------------------------------------------------------------------------------------------------------------------------------------------------------------------------------------------------------------------------------|
| Australia | In early 2019, the Australian government assigned citizens a secure, online health record. My Health Record (MyHR) aspires to house summary information uploaded from encounters with the health system nationwide. <sup>5</sup>                                                                                                                                                                                                                                                                                                                                                                                                                                                                                         |
| Canada    | In Canada, 85% of family practice physicians, and 79% of specialist physicians report using an electronic medical record. <sup>6</sup> However, only 22% of Canadians can access portions of their medical records electronically. No patients have access to their entire records. <sup>7</sup>                                                                                                                                                                                                                                                                                                                                                                                                                         |
| Chile     | Chile has a two-tier health system, with public and private health insurance. <sup>8</sup> Roughly 73% of community hospitals, 68% of primary care networks, and 50% of emergency care units use electronic health records. <sup>9</sup> However, use of health IT by patients is limited to making online appointments or accessing public health resources. If at all, citizens can access only very limited personal health information.                                                                                                                                                                                                                                                                              |
| Japan     | In Japan, health systems, hospitals and small practices work with various electronic health record systems. Citizens have the legal right to request medical records, but most are unaware of this opportunity. The majority of citizens do not have digital access to their health records, although apps are available that display lists of prescriptions available at pharmacies. <sup>10</sup>                                                                                                                                                                                                                                                                                                                      |
| Sweden    | Swedish citizens have the right to receive copies of their medical records. The Swedish government established a national health information infrastructure connecting a national patient portal with all different electronic health record systems used in the country. The patient portal gives everyone access to their electronic health record, which is accessible using an ID based on a national personal identification number. Individual counties decide what information patients can access from their electronic health record systems. As of May 2020, 68.3% of citizens had logged into the patient portal account, and 36.8% had accessed their record through the portal at least once. <sup>11</sup> |

|               |                                                                                                                                                                                                                                                                                                                                                                                                                                                                                            |
|---------------|--------------------------------------------------------------------------------------------------------------------------------------------------------------------------------------------------------------------------------------------------------------------------------------------------------------------------------------------------------------------------------------------------------------------------------------------------------------------------------------------|
| United States | About 80% of doctors, and nearly all hospitals in the U.S. use electronic health records (EHRs). <sup>12</sup> In 2017, a little over half of patients reported offers of online access to their records, either by their providers or by their insurers. Among them, a little more than half registered on their health systems' secure portals and viewed their records at least once. <sup>13</sup> Health providers control what patients can and cannot access through these portals. |
|---------------|--------------------------------------------------------------------------------------------------------------------------------------------------------------------------------------------------------------------------------------------------------------------------------------------------------------------------------------------------------------------------------------------------------------------------------------------------------------------------------------------|

### Sidebar: Each patient/care partner author was prompted to think about these 5 questions.

#### Question

As a patient, what information can you (and can you not) access in your medical record?

How has access/lack of access impacted your medical decision-making?

How are patients in your country "hacking" (modifying) traditional/approved methods of access to medical information in search of improved health outcomes?

How are patients in your country redefining their roles, including the words "patient" and "health outcomes"?

How might medicine profit from listening carefully to patients and their evolving roles?

## Perspectives

### Sweden: Knowledge is power

Sara Riggare

In the mid-1980s, I discovered in my early teens that something was not right with my body. At times, my muscles became rigid and tense, making me slow and clumsy, especially during repetitive movements such as brushing my teeth. I learned I have a form of Parkinson's disease, and for more than 30 years now I have been living with this condition.

My overall strategy? Care for myself. Without medications, my body does not function, but my doctor has *no way of knowing* if and how I take medications he prescribes. Until recently, my neurologist did not provide online access to my healthcare records, but I collected them all on paper and placed them in a binder. I review open access scientific publications online, looking for new research results that might benefit me. I combine what I learn with data and observations I collect myself, all of which enables me to understand and better manage my condition.

Some years back I came across a new study documenting effects of a drug under evaluation for *freezing of gait*, one of my symptoms. I emailed the article to my neurologist. We agreed it was worth exploring, and I got a prescription. Soon we both concluded it did indeed improve my gait.

Working with a doctor this way is not unique to me. In a recent survey, 68% of Swedish respondents with Parkinson's disease saw their neurologist for an hour or less annually.<sup>14</sup> As patients, we take prime responsibility for managing our own health. Meanwhile, our neurologists can attend to people who need more help.

### Chile: My arthritis, in bits and pieces

Cecilia Rodriguez

1  
2  
3 I have rheumatoid arthritis, and when I go to the hospital for a day to get my IV medication, they  
4 print a copy of the visit and give it to me. Often it is handwritten and hard to read. Beyond that, I  
5 can get some exam results from the clinic website, but only with a special code for a one-time  
6 download. I cannot compare results of my exams in one place, so I print them or save them on  
7 my computer in case I need to look at them again. I want to make my own decisions, so this has  
8 meant getting lots of paper together. But often I can't find the right one. I know I put it  
9 somewhere!  
10  
11

12  
13 This year, my mom gave me a notebook for my birthday. It had the medical information she had  
14 saved from the first 14 years of my life! It might sound crazy or unnecessary, but it's important  
15 for me. I was once admitted for pericarditis (a swelling of the membrane surrounding the heart).  
16 Afterwards, I couldn't remember my actual diagnosis; I kept forgetting things I wanted to tell my  
17 doctor; and he kept telling me things that were so important. I laugh about this present from my  
18 mom, but it makes me feel safe to have my medical story together again.  
19  
20

### 21 **Japan: Can technology help patients become more active agents in their care?**

22 **Maho Isono, PhD**  
23  
24

25 I think medicine in Japan is profiting from listening carefully to patients. As anthropologist Arthur  
26 Kleinman pointed out, the community is the biggest space in which patients deal with illness.<sup>15</sup>  
27 Today this space is changing and growing rapidly because of the expansion of online platforms  
28 where patients can take in and mingle knowledge from scientific medicine and traditional  
29 medicine. Then they establish their own understanding and management for their illness.  
30 Patients move beyond being objects of biomedicine to become active agents who choose how  
31 and when to move around within the various sectors of health and illness.  
32  
33

34  
35 Numerous communities organized by patients with various diseases exist in Japan. One  
36 remarkable approach to achieve patient-centered medicine is *tojisha-kenkyu*. *Kenkyu* means  
37 study, investigation, and research. *Tojisha* refers to interested persons, disabled persons  
38 themselves, or patients themselves. In *tojisha-kenkyu*, *tojisha* share their everyday problems  
39 with one another, then analyze and discuss how to deal with them. This is noteworthy since,  
40 rather than getting advice from medical professionals, *tojisha* find solutions or a way of  
41 managing problems from the perspectives of *tojisha* themselves. Founded initially in 2001 by  
42 the social welfare facility Bethel House in Hokkaido, it has become a prominent activity of  
43 people with mental disorders. Different from self-support groups, individuals conducting *tojisha-*  
44 *kenkyu* share their findings with the public. This has been particularly significant for people with  
45 mental disorders, since in our country their experiences have often been suppressed and  
46 hidden.<sup>16</sup> *Tojisha-kenkyu* has been further developed. For instance, *tojisha* and researchers  
47 from fields such as cognitive science and robotics are working together to explore the scientific  
48 validity of the hypotheses generated by *tojisha-kenkyu*.<sup>17</sup> In light of the purpose of this paper,  
49 *tojisha-kenkyu* made it possible for *tojisha* to create, accumulate, and update their own record of  
50 everyday problems which is not restructured by medical gaze.  
51  
52  
53  
54  
55  
56  
57  
58  
59  
60

1  
2  
3 Some patients are trying and reporting that new technologies are helping. However, patients  
4 occasionally report that technology is increasing anxiety, rather than helping. In my medical  
5 anthropological research, I interviewed an individual whose atrial fibrillation (irregular heartbeat)  
6 comes and goes. He bought a micro ECG machine to keep track of his pulse. He tried to find a  
7 pattern in his irregular pulse, but over time couldn't make one out. He didn't enjoy watching his  
8 irregular pulses every day, and eventually he stopped wearing the device. Our engaged patients  
9 are still discovering how to strike the right balance in patient empowerment.  
10  
11

### 12 13 **Canada: From access, to control of our own health data** 14 **Selina Brudnicki** 15

16  
17 I saw first-hand the hardships my late mother experienced obtaining copies of her records. She  
18 had to navigate her health and share information with her care team. She underwent breast  
19 cancer treatment at several facilities and learned to interpret her results with the help of her  
20 doctors. I kept her 'big binder' of results. It includes pathology and diagnostic imaging reports,  
21 and even a few oncologists' notes. Therein lies also my mother's own handwritten note: "[The  
22 doctor's] report does not seem correct. I always mention 'pain,' not discomfort. I kept  
23 complaining about a new pain." One year too late, a second opinion and review of her medical  
24 notes revealed that she and her doctor were not on the same page. There was evidence that  
25 her cancer had already spread to her lungs and liver. She died soon thereafter.  
26  
27  
28

29 I am a senior manager at University Health Network (UHN), Toronto, and my colleagues and I  
30 work closely with patients to understand their needs and priorities so they can better manage  
31 their health. Co-designed with patients, care partners and staff, we co-created a secure website  
32 that enables patients to see their appointment schedules, test results, pathology and diagnostic  
33 imaging reports, and clinical notes at the same time they become available to their care team.  
34 There are links to patient education resources, and patients may share their health record with  
35 others. After a year, 94% of patients reported improved patient experience. They felt better  
36 prepared for appointments, for decisions they needed to make, and reported improved  
37 communication and management of their care.<sup>18</sup>  
38  
39  
40

41 Today, patients want visibility and transparency into all their health data, but they face a large  
42 cultural divide: Health information custodians and care providers in our country currently control  
43 what, when, and whether patients can access their own data. In response, we collaborated with  
44 patients, their care partners, government, and industry subject matter experts to advance a new  
45 paradigm in which patients have the ability to authorize, revoke and monitor secondary use of  
46 their data. That way they can both take control over their health data and consent to sharing  
47 their data with trusted sources.  
48  
49  
50

### 51 **Australia: Dad's old and ill. What may his future hold?** 52 **Louise K. Schaper, PhD** 53

54  
55 Today, Dad sent me a picture of prescription medications that would fill two shoe boxes. He's  
56 been 'shopping up' big, in preparation for a 2-month vacation. I suspect it will be his last. Ever  
57  
58  
59

1  
2  
3 the stoic head of household, Dad tells us he's fine, and while we know that's untrue, we don't  
4 know if he's a bad liar or in denial. Every time he's prescribed a new drug or there's a new  
5 symptom, Mum phones to fill me in. My parents don't have the Internet, and since I'm the one  
6 with a health degree I get asked to interpret medical symptoms and pill prescriptions.  
7

8  
9 Given Dad's deteriorating health, I was desperate to see what his doctors actually think, and  
10 Dad granted me proxy access to his My Health Record (MyHR). Now I can help interpret  
11 information and often put his and my family's mind at ease. But he doesn't tell his medical team  
12 about how regularly his blood pressure goes to levels that could kill most people. He 'wouldn't  
13 want to bother them.'  
14

15  
16 I learned from Dad's record that he is on 12 different prescription medications, and there's also  
17 an audit trail of every medical appointment he has had. But it's limited to the date and name of  
18 the clinician only. Basically, the information in MyHR is limited to what's in a government  
19 database of prescriptions and appointments, information we already have. Dad's clinicians are  
20 not uploading any of his clinical notes, and neither are the pathologists. He could actually  
21 request more information, but I can hear Dad's voice in my head: "*No. The doctor is too busy  
22 and I don't want to make a fuss.*"  
23  
24  
25

26 So meanwhile, my family and I are none the wiser. Our hopes remain unrealized: To uncover  
27 information that could help Dad change his behaviors or reveal errors (if he'd dare point them  
28 out to his doctors). For now, I'm left with a question that gnaws at me: "If they're denied access  
29 to their own health information, how can patients have agency over their own health?"  
30  
31

## 32 **United States: Even the activist struggles**

33 **Liz Salmi**  
34  
35

36 I was diagnosed with an astrocytoma (a slow growing brain cancer) one week after my 29<sup>th</sup>  
37 birthday, and since then I've lived in a world of uncertainty: 20 more years, or 20 more months?  
38

39 My way of coping with uncertainty? Understand as much as I can about my condition and plan  
40 for treatment. For this I have found the patient portal a trusted sidekick. After surgeries,  
41 seizures, appointments and tests, the patient portal is where I turn to be reminded of the  
42 growing narrative that is my medical history.  
43  
44

45 One day, after a few months of chemotherapy, I recognized a pattern in the lab results available  
46 on my patient portal. It showed me when I was at risk for thrombocytopenia and would need to  
47 delay treatment. Thereafter, instead of waiting for permission to start my next round of oral  
48 chemotherapy, I would email my doctor:  
49  
50

51 *Dear Dr. S,*

52 *My lab work appears to be the same as last month. Please authorize a refill for*  
53 *temozolomide. Per the plan we discussed during our last visit, I will pick up the*  
54  
55  
56  
57  
58  
59  
60

1  
2  
3 *prescription on my way home from work tomorrow and begin my next round of chemo on*  
4 *Monday.*  
5

6  
7 She agreed with this process, and my ability to turn information into knowledge (with guidance  
8 from my doctor) returned a sense of autonomy to me at a time when I felt I had almost no  
9 control over any other aspect of my health.  
10

11 Positive reinforcement from my doctors has molded me into the proactive patient I am today.  
12 However, even with widespread availability of patient portals, patient activists like me continue  
13 to struggle to gain access to the most important part of our medical records: the doctor's note. In  
14 the U.S., we've had the right by law for more than 20 years to request and receive copies of our  
15 full medical records—including our doctors' notes. But these requests take time and effort, and  
16 costs can be involved.<sup>19</sup> I once requested a copy of my record and finally got it on a DVD. Had I  
17 asked for a paper copy, I would have had to pay \$725.40 out of my own pocket. All that just to  
18 own what is inherently mine! Today, almost 15% of Americans have gained access to clinical  
19 notes through a portal, but the actual "read rates" of notes remain low, virtually across the  
20 board.<sup>20,21</sup> It's not easy to change long-standing culture and habits!  
21  
22  
23  
24

## 25 **In Conclusion**

26  
27 As these anecdotes demonstrate vividly, the global impact of electronic medical records varies  
28 widely and will no doubt continue to do so for a very long time. The emerging technologies that  
29 will further define and refine medical records need to reflect different cultures, individual  
30 sensibilities, socio-economic factors, and myriad other phenomena. But the perspectives we  
31 display have a common denominator: persistent resourcefulness as individuals work to bridge  
32 gaps in their personal health information.  
33  
34

35  
36 Some describe patient engagement as the "blockbuster drug" of the 21<sup>st</sup> century, but how many  
37 will want to engage in ways described by those featured in this paper?<sup>22</sup> Are large numbers of  
38 people, perhaps even most people, capable of becoming so resourceful? We suggest the  
39 answer may be "yes." We suspect the potential is there, with the caveat that patients become  
40 truly engaged only when they have a more complete picture of their own health.  
41  
42

43 Transparent medical information is spreading. While in some cultures different views prevail,  
44 most nations agree today that patients have a right to access their own health information.  
45 Offering patients ready access to their own medical records makes sense, because patients  
46 (and their care partners) need abundant information in order to engage optimally in their care,  
47 while regaining and retaining autonomy in their lives.  
48  
49  
50  
51  
52  
53  
54  
55  
56  
57  
58  
59  
60



## ACKNOWLEDGEMENTS

---

The authors wish to thank the alumni and staff of Salzburg Global Session 553, "Toward a Shared Culture of Health: Enriching and Charting the Patient-Clinician Relationship," for their leadership on this topic.

## AUTHORS' CONTRIBUTIONS

---

All authors contributed substantially to the manuscript. TD, LS, and JW conceived the idea and design. LS, SB, MI, SR, CR, and LKS developed country-specific content. TD, LS, and JW drafted and critically revised the text.

## CONFLICTS OF INTEREST

---

The authors report no conflict of interest.

## FUNDING STATEMENT

---

This work was supported by the Salzburg Global Seminar, the John F. Keane & Family Foundation, and the Wang Foundation.



## REFERENCES

---

1. Krumholz H. The Unfortunate Truth About Getting Your Medical Records. *Forbes*. 2018:5-8. [https://www.forbes.com/sites/harlankrumholz/2018/10/05/the-unfortunate-truth-about-getting-your-medical-records/amp/?\\_\\_twitter\\_impression=true](https://www.forbes.com/sites/harlankrumholz/2018/10/05/the-unfortunate-truth-about-getting-your-medical-records/amp/?__twitter_impression=true).
2. Topol E, Salmi L. Portal to nowhere. Twitter. doi:10.1017/CBO9781107415324.004
3. Delbanco T, Esch T. Toward a Shared Culture of Health: Enriching and Charting the Patient-Clinician Relationship Session 553. In: *Salzburg Global Seminar*. ; 2017. <https://www.salzburgglobal.org/multi-year-series/health/pageld/session-553.html>. Accessed October 24, 2019.
4. Krumholz HM. Opinion: It Should Be Easier To Access Your Medical Records : Shots. *NPR*. 2019. <https://www.npr.org/sections/health-shots/2019/08/28/754725843/opinion-its-your-right-to-see-your-medical-records-it-shouldn-t-be-this-hard-to->. Accessed October 24, 2019.
5. Australian Government, Australian Digital Health Agency. My Health Record: Control your health information securely, in one place. <https://www.myhealthrecord.gov.au/>. Accessed October 24, 2019.
6. Leaver C. *Use of Electronic Medical Records among Canadian Physicians*. 2017. <https://www.infoway-inforoute.ca/en/component/edocman/resources/reports/benefits-evaluation/3362-2017-cma-workforce-survey-digital-health-results>. Accessed June 25, 2020.
7. Canada Health Infoway. *Connecting Patients for Better Health*. 2018. <https://www.infoway-inforoute.ca/en/component/edocman/3564-connecting-patients-for-better-health-2018/view-document?Itemid=101>. Accessed June 25, 2020.
8. Martinez-Gutierrez MS. Income and health insurance type in Chile : Effects on health and health. *Cent Lat Am Stud Univ California, Berkeley*. 2014:2010-2013.
9. Taylor EA, Fischer SH, Gracner T, et al. Current Efforts to Implement Health IT in Chile. In: *Developing a Strategic Program for Chilean Health Information Technology: Environmental Scan and Key Informant Interviews*. ; 2016:10-19. doi:10.7249/j.ctt19w739p.10
10. NPO Japan Medical Network Association. What is the Millennial Medical Record? <http://www.gehr.jp/about/index.html>. Accessed October 24, 2019.
11. Inera. Inera Statistics. Inera.se. <https://www.inera.se/aktuell/statistik/>. Accessed June 25, 2020.
12. Secretary of Health and Human Services. *Report to Congress on Health IT Progress: Examining the HITECH Era and the Future of Health IT*. Vol 3001.; 2016. <http://dashboard.healthit.gov/report-to-congress/2016-report-congress-examining-hitech-era-future-health-information-technology.php>.
13. Patel V, Johnson C, The Office of the National Coordinator for Health Information Technology. *Individuals' Use of Online Medical Records and Technology for Health Needs*.; 2018. <https://www.healthit.gov/sites/default/files/page/2018-03/HINTS-2017-Consumer-Data-Brief-3.21.18.pdf>. Accessed July 29, 2019.
14. Riggare S, Institutet K, Pär S, et al. Patients are doing it for themselves: A survey on disease-specific knowledge acquisition among people with Parkinson's disease in Sweden. *Health Informatics J*. 2019;25(1):91-105. doi:10.1177/1460458217704248
15. Kleinman A. *Patients and Healers in the Context of Culture: An Exploratio of the Boderland between Anthropology, Medicine, and Psychiatry*. Berkeley, CA: University of California, Berkeley; 1980.
16. Ishihara K (ed. . *Tojisha Kenkyu No Kenkyu*. Tokyo, Igakushoin; 2013.
17. Kumagaya Laboratory. Facilitation and verification of Tojisha-Kenkyu through an

- 1  
2  
3 interdisciplinary approach. 2020:1. <https://www.rcast.u-tokyo.ac.jp/content/000009298.pdf>.
- 4  
5 18. Brudnicki S, Bishop L, Bakas V, et al. Delivering Results as Patients Access Their Online  
6 Medical Records. In: *In EHealth*. Vancouver, CA; 2018.
- 7 19. Lye CT, Forman HP, Gao R, et al. Assessment of US Hospital Compliance With  
8 Regulations for Patients' Requests for Medical Records. *JAMA Netw open*.  
9 2018;1(6):e183014. doi:10.1001/jamanetworkopen.2018.3014
- 10 20. OpenNotes®. OpenNotes Map. <https://www.opennotes.org/join/map/>. Accessed May 25,  
11 2020.
- 12 21. Santa J, Wachenheim D, Chin H, Fellows A. *Implementing OpenNotes: Improving Patient*  
13 *Access to Notes on Patient Portals.*; 2018.
- 14 22. Chase D. Patient Engagement is the Blockbuster Drug of the Century. *Forbes*.  
15 2014:2012-2015.  
16  
17  
18  
19  
20  
21  
22  
23  
24  
25  
26  
27  
28  
29  
30  
31  
32  
33  
34  
35  
36  
37  
38  
39  
40  
41  
42  
43  
44  
45  
46  
47  
48  
49  
50  
51  
52  
53  
54  
55  
56  
57  
58  
59  
60
